# Supplementary material for: Heat generation and light scattering of green fluorescent protein-like pigments in coral tissue
Source: PubMed Central journal article supplement (PMC4880895; doi:10.1038/srep26599), 2016-05-26
Supplement: srep26599-s1.pdf [file srep26599-s1.pdf]

1 **Supplementary Information:**

2 **Heat generation and light scattering of green fluorescent protein-like**  
3 **pigments in coral tissue**

4  
5 **Running title:**

6 Coral heating and FPs

7  
8 Niclas H. Lyndby<sup>a</sup>, Michael Kühl<sup>a,b,1</sup>, and Daniel Wangpraseurt<sup>a,b,1</sup>

9  
10 <sup>a</sup>Marine Biological Section, Department of Biology, University of Copenhagen, DK-3000 Helsingør,  
11 Denmark

12 <sup>b</sup>Plant Functional Biology and Climate Change Cluster, University of Technology Sydney, New South  
13 Wales 2007, Australia

14 <sup>1</sup>Corresponding authors: [Daniel.wangpraseurt@bio.ku.dk](mailto:Daniel.wangpraseurt@bio.ku.dk), [mkuhl@bio.ku.dk](mailto:mkuhl@bio.ku.dk)

15

16

17

18

19

20

21

22 **Supplementary Figures**

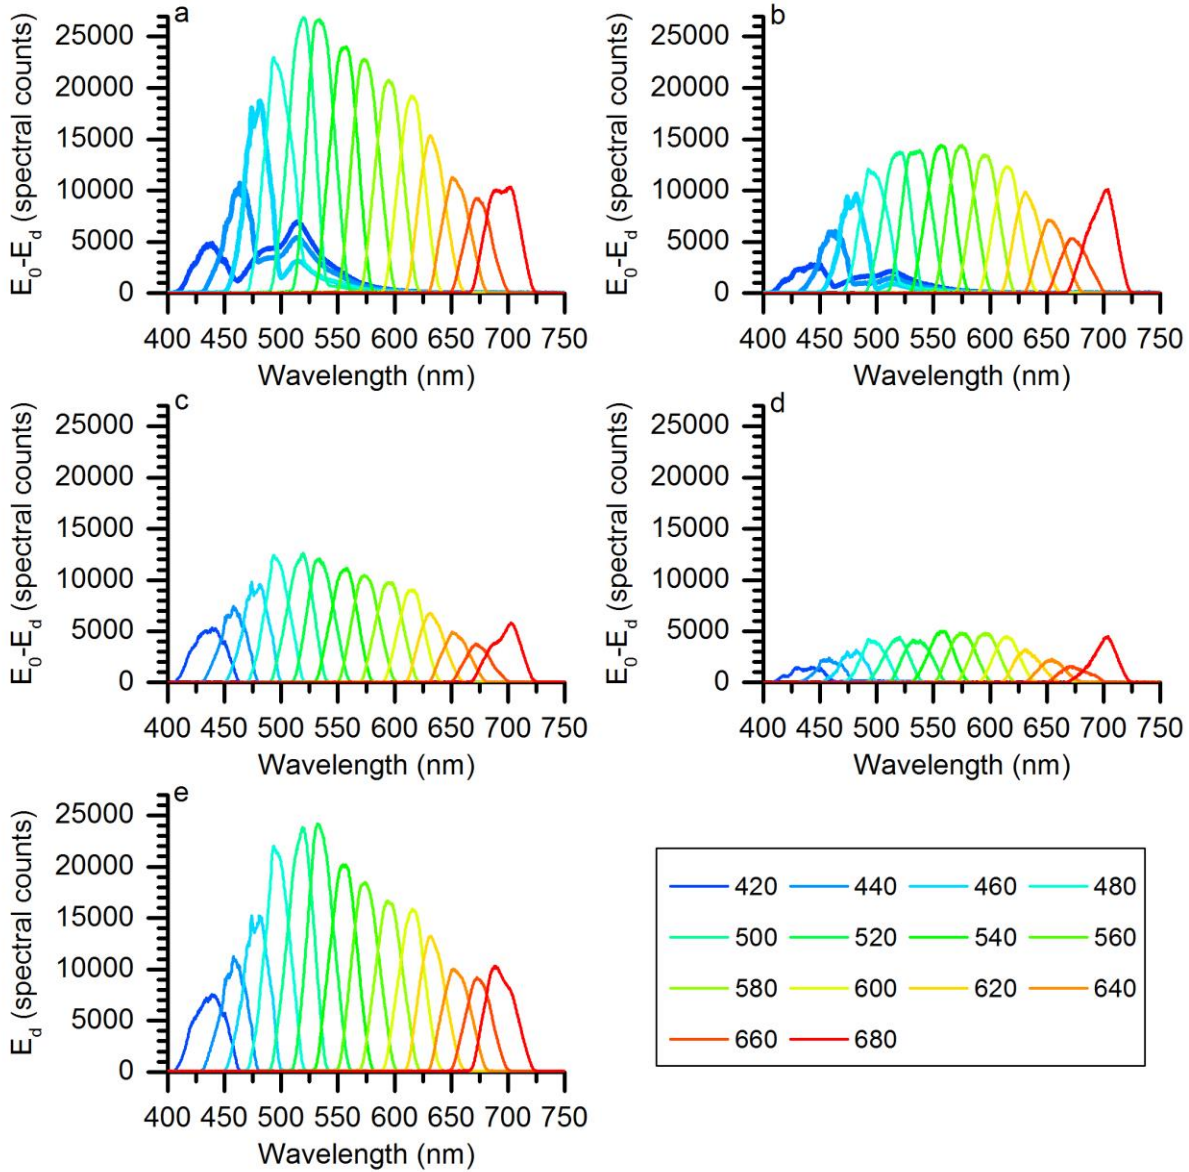

23

24 **Figure S1: Coral tissue surface scalar irradiance as a function of wavelength.** The figure is  
25 complimentary to Figure 6. (a-d) Enhancement of spectral scalar irradiance (coral tissue surface  $E_0 -$   
26  $E_d$ ) at the tissue surface of the a) HF polyp, b) NF polyp, c) HF coenosarc and d) NF coenosarc tissues  
27 ( $n=3$ ). (e) Spectral distribution of the incident downwelling irradiance for the different wavebands used  
28 for illumination. The incident spectral irradiance was delivered in steps of 20 nm between 400-700 nm

29 (see methods). Thick lines in (a) and (b) represent spectral bands for which green fluorescence was  
 30 pronounced. For clarity only means are shown;  $n=3$ .

31

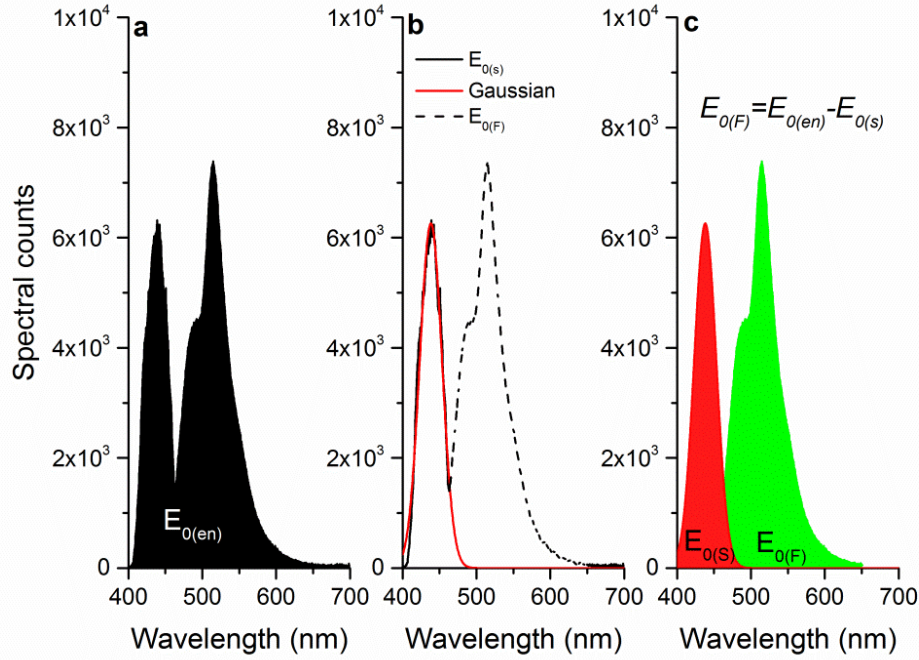

32

33 **Fig. S2. Separation of scattering and fluorescence contributions to  $E_0$  enhancement.** (a) The total

34 enhancement of scalar irradiance was  $E_{0(en)} = \left[ \int_{400}^{700} E_0(\lambda) d\lambda \right] - \left[ \int_{400}^{700} E_d(\lambda) d\lambda \right]$  b) The fluorescence

35 contribution to  $E_{0(en)}$  was approximated based on the Stokes shifted spectrum (dashed black line)

36 relative to the spectral distribution of the incident light spectrum. Data points indicative of fluorescence

37 between 420-620 nm were removed (dashed black line) and the spectrum (black line) was fitted to a

38 Gaussian distribution (red line) based on a non-linear least squares Levenberg–Marquardt iteration

39 algorithm ( $R^2 > 0.98$ ). c) The contribution of scattering (red area) was  $E_{0(s)} = \int_{400}^{700} Gaus(\lambda) d\lambda$  and the

40 contribution of fluorescence was  $E_{0(F)} = E_{0(en)} - E_{0(s)}$  and was finally expressed as percentage of the

41 enhancement factor (see main text).

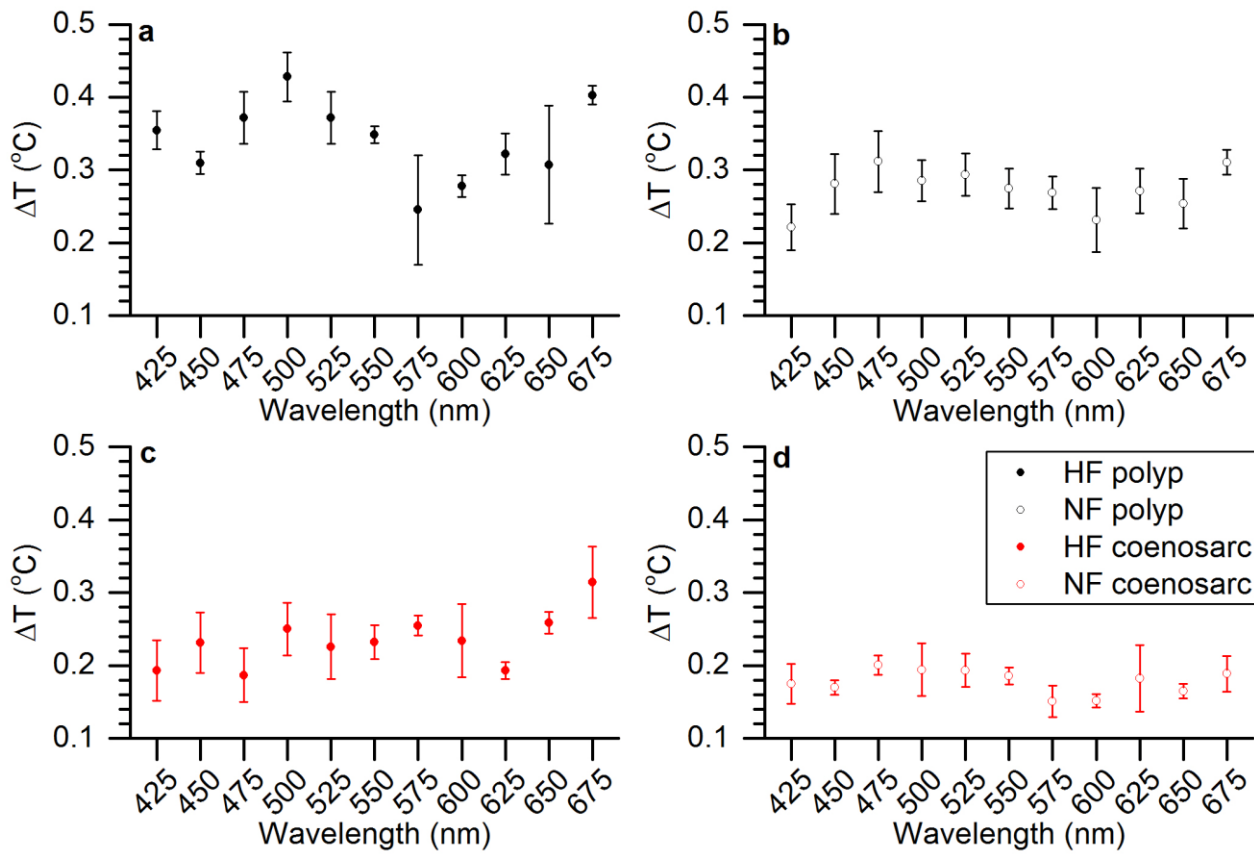

42

43 **Figure S3: Coral thermal action spectrum normalized for equal photon irradiance.** Coral tissue  
 44 surface heating is expressed as  $\Delta T$ , i. e., the difference between coral surface temperature and the  
 45 temperature in the ambient water, and was normalized for to a photon irradiance of  $418 \mu\text{mol photons}$   
 46  $\text{m}^{-2} \text{s}^{-1}$  ( $\pm 1 \mu\text{mol photons m}^{-2} \text{s}^{-1}$ ) over each spectral band. Measurements were performed for a) HF  
 47 polyp, b) NF polyp, c) HF coenosarc and d) NF coenosarc tissues ( $n=3$ ).

48

49

50

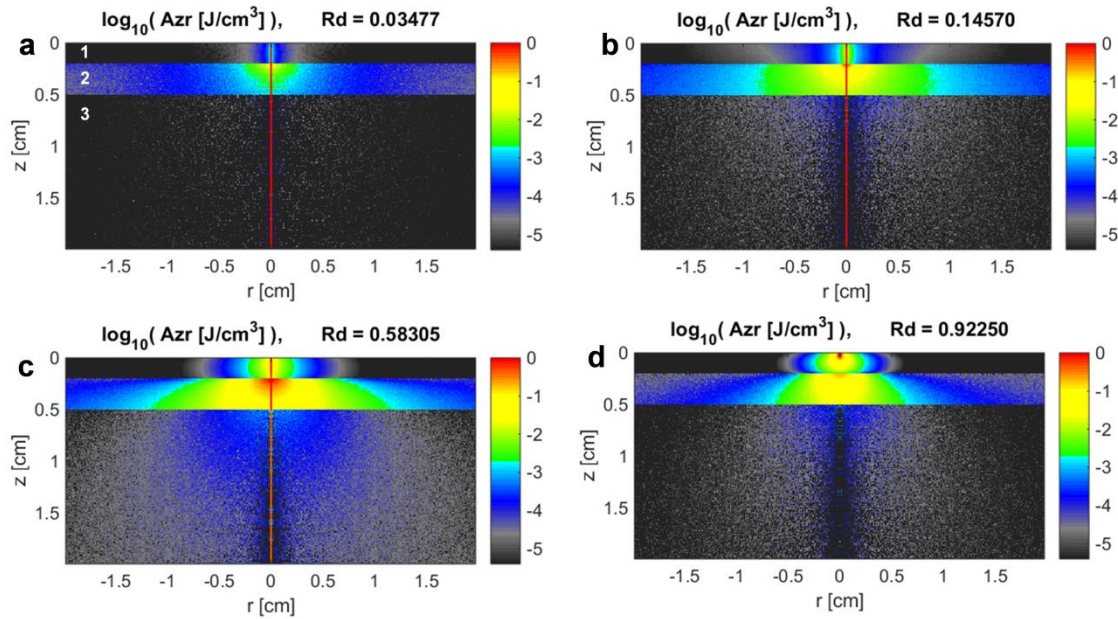

51

52 **Figure S4. Monte Carlo simulations of light absorption in a simplified multilayered coral**  
 53 **structure.** The simulation was developed to illustrate and support basic principles of light scattering  
 54 and absorption/heating in multilayered biological tissues. Monte Carlo simulations are stochastic  
 55 models that are used in medical tissue optics to simulate photon propagation and score physical  
 56 quantities (diffuse reflectance, absorbance, transmittance) based on a set of optical properties<sup>1</sup>. The  
 57 present work used the multilayered Monte Carlo model (MCML<sup>2</sup>) which is regarded as the ‘gold  
 58 standard’ in modeling photon transport in turbid media.

59 The model uses 3 layers (1, 2, 3) noted with white font in (a). The top layer (1) is the fluorescent  
 60 pigment layer (representative of the epidermal coral tissue layer), the middle layer (2) is the light  
 61 absorbing layer (representative of the photosymbiont-containing gastrodermal layer), the bottom layer  
 62 (3) is a light distributing scattering layer (representative of the coral skeleton). The actual number of  
 63 tissue layers of the entire coral tissue is higher but including further complexity is not needed in this  
 64 model, as it aims at illustrating how changes in light scattering of a top layer can affect light absorption  
 65 in layers below.

66 The optical properties of layer 2 and 3 were fixed in all cases (a-d) and only the optical properties  
 67 of the fluorescent pigment layer were changed. The model assumes isotropic scattering throughout, i.  
 68 e., the anisotropy of scattering  $g = 0$ . The optical properties of layer 3 were chosen to be mainly light

69 distributing and characterized by low absorption and low scattering. The properties were set to:  
70 absorption coefficient ( $\mu_a$ ) = 0.001 cm<sup>-1</sup>, scattering coefficient ( $\mu_s$ ) = 0.001 cm<sup>-1</sup>.

71 The optical properties of layer 2 were chosen to be light absorbing, representative of the  
72 gastroduermal layer (or a combination of tissue layers where light is absorbed either by chromoproteins  
73 and/or *Symbiodinium* cells). The optical properties of layer 2 were set to:  $\mu_a$  = 0.1 cm<sup>-1</sup>,  $\mu_s$  = 0.001 cm<sup>-1</sup>.

74 The optical properties of layer 1 were chosen to be the light scattering layer, characterized by  
75 varying densities of light scattering fluorescent host pigments. The scattering was for a)  $\mu_s$  = 0.1 cm<sup>-1</sup>,  
76 b)  $\mu_s$  = 1 cm<sup>-1</sup>, c)  $\mu_s$  = 10 cm<sup>-1</sup>, and d)  $\mu_s$  = 100 cm<sup>-1</sup>. The absorption coefficient was constant ( $\mu_a$  =  
77 0.001 cm<sup>-1</sup>).

78 The model scores light absorption, which is shown as log<sub>10</sub> (Azr [in J/cm<sup>3</sup>]) in a false colour  
79 scale. The model was developed in 2-D, where depth (z) is modelled from the tissue surface down to  
80 1.8 cm. The model extends uniformly along the y-axis (r). An infinitely narrow photon beam is  
81 delivered as vertically incident irradiance at the centre of the model (red line). The diffuse reflectance  
82 ( $R_d$ ), i.e. the photon flux that escapes the tissue after specular reflection and/or multiple scattering is  
83 shown as a fraction of 1 (where 1= total reflectivity).

84 The model illustrates that differences in the scattering of a single top layer (1) can lead to a non-  
85 linear behavior of heating/absorption (log<sub>10</sub> (Azr [in J/cm<sup>3</sup>])). Low scattering (a) of the top layer leads to  
86 low heating and low diffuse reflectance, while higher scattering (b-c) increases both diffuse reflectance  
87 and heating. At very high densities (d) of the top light scattering layer, heating is reduced because of  
88 reduced vertical penetration depth and most of the light escapes as diffuse reflectance.

89

## 90 **Supporting References**

- 91 1. Tuchin VV. *Tissue optics: light scattering methods and instruments for medical diagnosis*.  
92 SPIE press Bellingham (2007).
- 93 2. Wang L, Jacques SL, Zheng L. MCML—Monte Carlo modeling of light transport in multi-  
94 layered tissues. *Computer Methods and Programs in Biomedicine* **47**, 131-146 (1995).

95
